# Supplementary material
Source: PubMed Central journal article supplement (PMC4682350)
Supplement: NIHMS626849-supplement.pdf [file NIHMS626849-supplement.pdf]

## **Ocular Hypertension Treatment Study Group**

### ***Arizona***

**Steven H. Cobb, MD**

Mayo Clinic Scottsdale  
13400 East Shea Blvd.  
Scottsdale, AZ 85259

**Jackie J. Jacobsen**

Mayo Clinic Scottsdale  
13400 East Shea Blvd.  
Scottsdale, AZ 85259

### ***California***

**Richard S. Baker, MD**

Charles R. Drew University  
12021 South Wilmington Avenue  
Los Angeles, CA 90059

**Fermin P. Ballesteros, Jr**

University of California, San Francisco  
8 Koret Way, Room U507  
San Francisco, CA 94143

**James D. Brandt, MD**

UC Davis Department of Ophthalmology  
4860 Y Street, Suite 2400  
Sacramento, CA 95817

**Jeffrey J. Casper, MD**

UC Davis Department of Ophthalmology  
4860 Y Street, Suite 2400  
Sacramento, CA 95817

**Anne L. Coleman, MD, PhD**

Jules Stein Eye Institute, UCLA  
100 Stein Plaza  
Los Angeles, CA 90024

**Michael V. Drake, MD**

University of California, San Francisco  
Office of the President

1111 Franklin Street, 11<sup>th</sup> Floor  
Oakland, CA 94607

**Margarita X. Gonzalez**  
Jules Stein Eye Institute, UCLA  
100 Stein Plaza  
Los Angeles, CA 90024

**Simon K. Law, MD, PharmD**  
Jules Stein Eye Institute, UCLA  
100 Stein Plaza  
Los Angeles, CA 90024

**Michele C. Lim, MD**  
UC Davis Department of Ophthalmology  
4860 Y Street, Suite 2400  
Sacramento, CA 95817

**Shan C. Lin, MD**  
University of California, San Francisco  
Department of Ophthalmology  
533 Parnassus Street, Room 507>  
San Francisco, CA 94143

**Ivan R. Schwab, MD**  
UC Davis Department of Ophthalmology  
4860 Y Street, Suite 2400  
Sacramento, CA 95817

**J. Rigby Slight, MD**  
University of California, San Diego  
530 Lomas Santa Fe Drive, #8  
Solana Beach, CA 92075

**Robert L. Stamper, MD**  
University of California, San Francisco  
Department of Ophthalmology  
533 Parnassus Street, Room 507  
San Francisco, CA 94143

**Patricia W. Tam**  
University of California, San Francisco  
8 Koret Way, Room U507  
San Francisco, CA 94143

**Robert N. Weinreb, MD**

University of California, San Diego  
Department of Ophthalmology  
9500 Gilman Drive  
La Jolla, CA 92093

**Eunice Williams-Steppe, MA**

University of California, San Diego  
Department of Ophthalmology  
9500 Gilman Drive  
La Jolla, CA 92093

***Washington, DC***

**Frank S. Ashburn, MD**

Eye Associates of Washington, DC  
4910 Massachusetts NW, Suite 21  
Washington, DC 20016

**Clete C. Clark**

Washington Eye Associates, Physicians & Surgeons  
5454 Wisconsin Avenue, Suite 950  
Chevy Chase, MD 20815

**Douglas E. Gaasterland, MD**

Eye Doctors of Washington  
2 Wisconsin Circle, Suite 200  
Chevy Chase, MD 20815

**Linda A. Manier**

Eye Doctors of Washington  
2 Wisconsin Circle, Suite 200  
Chevy Chase, MD 20815

**Karen D. Schacht**

Eye Associates of Washington, DC  
4910 Massachusetts NW, Suite 21  
Washington, DC 20016

**Arthur L. Schwartz, MD**

Washington Eye Associates, Physicians & Surgeons  
5454 Wisconsin Avenue, Suite 950  
Chevy Chase, MD 20815

**Howard S. Weiss, MD**

Washington Eye Associates, Physicians & Surgeons  
5454 Wisconsin Avenue, Suite 950  
Chevy Chase, MD 20815

***Florida***

**Donald L. Budenz, MD**

University of Miami School of Medicine  
Bascom Palmer Eye Institute  
900 NW 17th Street  
Miami, FL 33136

**Francisco E. Fantes, MD**

University of Miami School of Medicine  
Bascom Palmer Eye Institute  
900 NW 17th Street  
Miami, FL 33136

**Steven J. Gedde, MD**

University of Miami School of Medicine  
Bascom Palmer Eye Institute  
900 NW 17th Street  
Miami, FL 33136

**Richard K. Parrish, MD**

University of Miami School of Medicine  
Bascom Palmer Eye Institute  
900 NW 17th Street  
Miami, FL 33136

***Georgia***

**Allen D. Beck, MD**

Emory University Eye Center  
1365B Clifton Road  
Atlanta, GA 30322

**Anastasios P. Costarides, MD, PhD**

Emory University Eye Center  
1365B Clifton Road  
Atlanta, GA 30322

**Donna Leef**

Emory University Eye Center  
1365B Clifton Road  
Atlanta, GA 30322

**Thomas S. Harbin, MD**

Eye Consultants of Atlanta  
95 Collier Road NW, Suite 3000  
Atlanta, GA 30309

**Lea M. Danner**

Eye Physicians & Surgeons  
1457 Scott Blvd  
Decatur, GA 30030

**Teresa A. Long**

Eye Consultants of Atlanta  
95 Collier Road NW, Suite 3000  
Atlanta, GA 30309

**Paul McManus, MD**

Eye Physicians & Surgeons  
1457 Scott Blvd  
Decatur, GA 30030

**Charles J. Patorgis, OD**

Eye Consultants of Atlanta  
95 Collier Road NW, Suite 3000  
Atlanta, GA 30309

**Shelly R. Smith**

Eye Physicians & Surgeons  
1457 Scott Blvd  
Decatur, GA 30030

**Julie M. Wright**

Eye Consultants of Atlanta  
95 Collier Road NW, Suite 3000  
Atlanta, GA 30309

***Kentucky***

**Joern B. Soltau, MD**

University of Louisville

Department of Ophthalmology  
301 East Muhammad Ali Boulevard  
Louisville, KY 40292

**Judit M. Ambrus**

University of Louisville  
Department of Ophthalmology  
301 East Muhammad Ali Boulevard  
Louisville, KY 40292

***Maryland***

**Donald A. Abrams, MD**

Krieger Eye Institute  
Sinai Hospital of Baltimore  
2411 West Belvedere Avenue  
Baltimore, MD 21215

**Sameer I. Ahmad, MD**

Johns Hopkins School of Medicine  
Department of Ophthalmology  
600 North Wolfe Street, Maumenee 809  
Baltimore, MD 21287

**David S. Friedman, MD, MPH**

Johns Hopkins School of Medicine  
Department of Ophthalmology  
600 North Wolfe Street, Maumenee 809  
Baltimore, MD 21287

**Ramzi Hemady, MD**

Maryland Center for Eye Care Associates  
22 S. Greene Street, Rm N6W45  
Baltimore, MD 21201

**Eve J. Higginbotham, MD**

Maryland Center for Eye Care Associates  
22 S. Greene Street, Rm N6W45  
Baltimore, MD 21201

**Henry D. Jampel, MD**

Johns Hopkins School of Medicine  
Department of Ophthalmology

600 North Wolfe Street, Maumenee 809  
Baltimore, MD 21287

**Irvin P. Pollack, MD**

Krieger Eye Institute  
Sinai Hospital of Baltimore  
2411 West Belvedere Avenue  
Baltimore, MD 21215

**Kevin L. Powdrill**

Maryland Center for Eye Care Associates  
22 S. Greene Street, Rm N6W45  
Baltimore, MD 21201

**Harry A. Quigley, MD**

Johns Hopkins School of Medicine  
Department of Ophthalmology  
600 North Wolfe Street, Maumenee 809  
Baltimore, MD 21287

**Pradeep Y. Ramulu, MD**

Johns Hopkins School of Medicine  
Department of Ophthalmology  
600 North Wolfe Street, Maumenee 809  
Baltimore, MD 21287

**Alan L. Robin, MD**

6115 Falls Road, Third Floor  
Baltimore, MD 21209

**Donald J. Zack, MD, PhD**

Johns Hopkins School of Medicine  
Department of Ophthalmology  
600 North Wolfe Street, Maumenee 809  
Baltimore, MD 21287

***Michigan***

**Juan L. Allen**

Kresge Eye Institute  
Wayne State University  
4717 St. Antoine Boulevard  
Detroit, MI 48201

**Monica Y. Allen-Alexander, MD**

Kresge Eye Institute  
Wayne State University  
4717 St. Antoine Boulevard  
Detroit, MI 48201

**Terry J. Bergstrom, MD**

WK Kellogg Eye Center  
University of Michigan  
1000 Wall Street  
Ann Arbor, MI 48105

**David A. Crandall, MD**

Henry Ford Medical Center - Troy  
Department of Ophthalmology  
2825 Livernois  
Troy, MI 48083

**Deborah Darnley-Fisch, MD**

Henry Ford Medical Center - Fairlane  
Department of Ophthalmology  
19401 Hubbard Drive  
Dearborn, MI 48126

**Aldo Fantin, MD**

Henry Ford Medical Center - Troy  
Department of Ophthalmology  
2825 Livernois  
Troy, MI 48083

**Melanie Gutkowski**

Henry Ford Medical Center - Troy  
Department of Ophthalmology  
2825 Livernois  
Troy, MI 48083

**Julianne Hall**

Henry Ford Medical Center  
Department of Ophthalmology  
2799 W. Grand  
Detroit, MI 48202

**Bret A. Hughes, MD**

Kresge Eye Institute  
Wayne State University



4717 St. Antoine Boulevard  
Detroit, MI 48201

**Nauman R. Imami, MD**  
Henry Ford Medical Center  
Department of Ophthalmology  
2799 W. Grand  
Detroit, MI 48202

**Mark S. Juzych, MD**  
Kresge Eye Institute  
Wayne State University  
4717 St. Antoine Boulevard  
Detroit, MI 48201

**Mark L. McDermott, MD**  
Kresge Eye Institute  
Wayne State University  
4717 St. Antoine Boulevard  
Detroit, MI 48201

**Sy E. Moroi, MD, PhD**  
WK Kellogg Eye Center  
University of Michigan  
1000 Wall Street  
Ann Arbor, MI 48105

**John M. O'Grady, MD**  
Kresge Eye Center  
Great Lakes Ophthalmology  
2393 Schust  
Saginaw, MI 48603

**Carol J. Pollack-Rindle**  
WK Kellogg Eye Center  
University of Michigan  
1000 Wall Street  
Ann Arbor, MI 48105

**John M. Ramocki, MD**  
Kresge Eye Institute  
Wayne State University  
4717 St. Antoine Boulevard  
Detroit, MI 48201

**Michelle A. Tehranisa**  
WK Kellogg Eye Center  
University of Michigan  
1000 Wall Street  
Ann Arbor, MI 48105

**Linda A. Van Conett**  
Kresge Eye Center  
Great Lakes Ophthalmology  
2393 Schust  
Saginaw, MI 48603

### ***Minnesota***

**David C. Herman, MD**  
Mayo Foundation  
200 First Street SW  
Rochester, MN 55905

**Rebecca A. Nielsen, LPN**  
Mayo Foundation  
200 First Street SW  
Rochester, MN 55905

### ***Missouri***

**Edward Barnett, MD**  
Washington University Medical Center  
Department of Ophthalmology & Visual Sciences  
660 South Euclid Avenue, Campus Box 8096  
St. Louis, MO 63110

**Benard Becker, MD**  
Washington University Medical Center  
Department of Ophthalmology & Visual Sciences  
660 South Euclid Avenue, Campus Box 8096  
St. Louis, MO 63110

**Anjali M. Bhorade, MD**  
Washington University Medical Center  
Department of Ophthalmology & Visual Sciences

660 South Euclid Avenue, Campus Box 8096  
St. Louis, MO 63110

**Jamie D. Kambarian**

Washington University Medical Center  
Department of Ophthalmology & Visual Sciences  
660 South Euclid Avenue, Campus Box 8096  
St. Louis, MO 63110

**Michael A. Kass, MD**

Washington University Medical Center  
Department of Ophthalmology & Visual Sciences  
660 South Euclid Avenue, Campus Box 8096  
St. Louis, MO 63110

**Carla J. Siegfried, MD**

Washington University Medical Center  
Department of Ophthalmology & Visual Sciences  
660 South Euclid Avenue, Campus Box 8096  
St. Louis, MO 63110

***New York***

**Yokasta E. Abreu, MD**

New York Eye Ear Infirmary  
310 East 14th Street  
New York, NY 10003

**Jeffrey M. Liebmann, MD**

New York Eye Ear Infirmary  
310 East 14th Street  
New York, NY 10003

**Robert Ritch, MD**

New York Eye Ear Infirmary  
310 East 14th Street  
New York, NY 10003

**Celso A. Tello, MD**

New York Eye Ear Infirmary  
310 East 14th Street  
New York, NY 10003

## ***Ohio***

**N. Douglas Baker, MD**  
Ophthalmology Surgeons Consultants  
262 Neil Avenue, Suite 410  
Columbus, OH 43215

**Robert J. Derick, MD**  
Ohio State University  
Havener Eye Institute  
915 Olentangy River Road  
Columbus, OH 43212

**Kathleen A. Lamping, MD**  
University Suburban Health Center  
1611 South Green, Suite 306A  
South Euclid, OH 44121

**Kathryne McKinney**  
Ohio State University  
Havener Eye Institute  
915 Olentangy River Road  
Columbus, OH 43212

**Cheryl Vitelli**  
University Suburban Health Center  
1611 South Green, Suite 306A  
South Euclid, OH 44121

**Paul A. Weber, MD**  
Ohio State University  
Havener Eye Institute  
915 Olentangy River Road  
Columbus, OH 43212

## ***Oregon***

**George (Jack) A. Cioffi, MD**  
Devers Eye Institute  
Legacy Portland Hospitals  
1040 NW 22nd Avenue, Suite 200  
Portland, OR 97210

**Steven L. Mansberger, MD**  
Devers Eye Institute  
Legacy Portland Hospitals  
1040 NW 22nd Avenue, Suite 200  
Portland, OR 97210

***Pennsylvania***

**G. Richard Bennett, MS, OD**  
Pennsylvania College of Optometry  
1200 West Godfrey Avenue  
Philadelphia, PA 19141

**Sheri G. Drossner**  
Scheie Eye Institute  
University of Pennsylvania  
51 North 39th Street  
Philadelphia, PA 19104

**Joan C. DuPont**  
Scheie Eye Institute  
University of Pennsylvania  
51 North 39th Street  
Philadelphia, PA 19104

**Eydie G. Miller-Ellis, MD**  
Scheie Eye Institute  
University of Pennsylvania  
51 North 39th Street  
Philadelphia, PA 19104

**Jane F. Niemczyk**  
Glaucoma Care Clinic.  
Philadelphia, PA 19007

**Jody R. Piltz-Seymour, MD**  
Glaucoma Care Clinic  
Philadelphia, PA 19007

**Prithvi S. Sankar, MD**  
Scheie Eye Institute  
University of Pennsylvania  
51 North 39th Street  
Philadelphia, PA 19104

**Texas**

**Peter T. Chang, MD**

Baylor Eye Clinic  
Baylor College of Medicine  
6560 Fannin, Suite 2200  
Houston, TX 77030

**Pamela M. Frady**

Baylor Eye Clinic  
Baylor College of Medicine  
6560 Fannin, Suite 2200  
Houston, TX 77030

**Ronald L. Gross, MD**

Baylor Eye Clinic  
Baylor College of Medicine  
6560 Fannin, Suite 2200  
Houston, TX 77030

**Silvia Orengo-Nania, MD**

Baylor Eye Clinic  
Baylor College of Medicine  
6560 Fannin, Suite 2200  
Houston, TX 77030
